# Supplementary material for: Aqueous all-manganese batteries
Source: Royal Society of Chemistry journal article supplement (doi:10.1039/d3ee01679j), 2023-01-01
Supplement: d3ee01679j1.pdf [file d3ee01679j1.pdf]

Supporting Information for

## **Aqueous All-Manganese Batteries**

*Mingming Wang<sup>†</sup>, Yahan Meng<sup>†</sup>, Yan Xu, Na Chen, Mingyan Chuai, Yuan Yuan, Jifei*

*Sun, Zaichun Liu, Xinhua Zheng, Ziqi Zhang, Dongjun Li, Wei Chen\**

Department of Applied Chemistry, School of Chemistry and Materials Science, Hefei  
National Research Center for Physical Sciences at the Microscale, University of  
Science and Technology of China, Hefei, Anhui 230026, China

*\*Corresponding authors: [weichen1@ustc.edu.cn](mailto:weichen1@ustc.edu.cn)*

## Experimental

### Materials.

The chemicals and materials in this work are all commercially available and used as received: manganese sulfate monohydrate ( $\text{MnSO}_4 \cdot \text{H}_2\text{O}$ , Sinopharm Chemical Reagent Co., Ltd), manganese chloride tetrahydrate ( $\text{MnCl}_2 \cdot 4\text{H}_2\text{O}$ , Sigma Aldrich), manganese nitrate solution ( $\text{Mn}(\text{NO}_3)_2$ , Sinopharm Chemical Reagent Co., Ltd), selenium dioxide ( $\text{SeO}_2$ , Sigma Aldrich), zinc sulfate heptahydrate ( $\text{ZnSO}_4 \cdot 7\text{H}_2\text{O}$ , Sinopharm Chemical Reagent Co., Ltd), copper sulfate pentahydrate ( $\text{CuSO}_4 \cdot 5\text{H}_2\text{O}$ , Sinopharm Chemical Reagent Co., Ltd), iron sulfate heptahydrate ( $\text{FeSO}_4 \cdot 7\text{H}_2\text{O}$ , Sinopharm Chemical Reagent Co., Ltd), ammonium sulfate ( $(\text{NH}_4)_2\text{SO}_4$ , Sigma Aldrich), ammonium chloride ( $\text{NH}_4\text{Cl}$ , Sigma Aldrich), sulfuric acid ( $\text{H}_2\text{SO}_4$ , Sinopharm Chemical Reagent Co., Ltd), carbon cloth (thickness of 200  $\mu\text{m}$ , Fuel Cell Store, USA), Cu foil (thickness of 100  $\mu\text{m}$ , Sinopharm Chemical Reagent Co., Ltd), carbon felt (Dalian Longtian Tech. Co.), graphite rod (Alfa Aesar, 99.9995%) and deionized water (resistance of 18.2  $\text{M}\Omega$ , Milli Q).

### Characterizations.

Scanning electron microscope (SEM, Hitachi 8220, Japan) was carried out to characterize the morphologies and structures of the electrodes. Transmission electron microscopy (TEM), high-resolution TEM (HRTEM) images and energy dispersive X-ray spectra (EDS) of the samples were collected on JEM F200 electron microscope at an acceleration voltage of 100 kV. X-ray photoelectron spectroscopy (Thermo ESCALAB 250Xi) was performed with Al  $\text{K}_\alpha$  source. X-ray diffraction (XRD) patterns were collected on a Philips X'Pert PRO SUPER X-ray diffractometer equipped with graphite monochromatized Cu  $\text{K}_\alpha$  radiation. Mn L-edge XAS and some related XPS tests were performed at the Photoelectron Spectroscopy Terminal Station on beamline BL10B at the National Synchrotron Radiation Laboratory (NSRL) in Hefei, China.

### Electrochemical tests.

The battery cycling performance was tested on battery test systems (LandHe, Wuhan, China, and Neware, Shenzhen, China). The galvanostatic charge-discharge rate capability and cyclic voltammetry of the three-electrode systems were carried out on a VMP3 electrochemical workstation (Bio-Logic, France). In the three-electrode measurements, metal foil, graphite rod and Ag/AgCl were used as the working, counter and reference electrodes, respectively. In the two-electrode symmetric battery, two metal foils were used as the working, counter and reference electrodes. The electrolyte composition of SeO<sub>2</sub>-free MnSO<sub>4</sub> is 1 mol L<sup>-1</sup> MnSO<sub>4</sub> and 1 mol L<sup>-1</sup> (NH<sub>4</sub>)<sub>2</sub>SO<sub>4</sub>. The electrolyte composition of SeO<sub>2</sub>-additive MnSO<sub>4</sub> is 1 mol L<sup>-1</sup> MnSO<sub>4</sub>, 1 mol L<sup>-1</sup> (NH<sub>4</sub>)<sub>2</sub>SO<sub>4</sub> and 0.02 g L<sup>-1</sup> SeO<sub>2</sub>. In the fabrication of the two-electrode full cell, carbon felts and Mn foil were acting as the cathode and anode, respectively, and the electrolyte consists of 1 mol L<sup>-1</sup> MnSO<sub>4</sub>, 1 mol L<sup>-1</sup> (NH<sub>4</sub>)<sub>2</sub>SO<sub>4</sub>, 0.02 g L<sup>-1</sup> SeO<sub>2</sub>, and 0.05 mol L<sup>-1</sup> H<sub>2</sub>SO<sub>4</sub> in water. The list of pH values of different electrolytes is shown in Table S2. All electrochemical tests were conducted at room temperature (~ 25 °C).

### The detailed calculation of theoretical capacity and energy density of the aqueous all-Mn battery.

When calculating the theoretical energy density, only the active materials of the positive and negative electrodes are considered, and the mass of other components is not considered. Therefore, the theoretical energy density calculation formula is as follows:

$$C_{(\text{battery specific capacity})} = 1 / (1/C_{(\text{cathode specific capacity})} + 1/C_{(\text{anode specific capacity})})$$

$$E_{(\text{theoretical energy density})} = C_{(\text{battery specific capacity})} * V_{(\text{average discharge voltage})}$$

It is known that the theoretical specific capacity of the cathode MnO<sub>2</sub>/Mn<sup>2+</sup> is 616 mAh g<sup>-1</sup>, and that of the anode Mn<sup>2+</sup>/Mn is 976 mAh g<sup>-1</sup>. Therefore, the theoretical energy density of the aqueous all-Mn battery is calculated as follows:

$$C_{(\text{battery specific capacity})} = 1 / (1/616 + 1/976) = 377.65 \text{ mAh g}^{-1}$$

$$E_{(\text{theoretical energy density})} = 377.65 \text{ mAh g}^{-1} * 2.42 \text{ V} = 913 \text{ Wh kg}^{-1}$$

|                                               | <b>Cu</b> | <b>Fe</b> | <b>Zn</b> | <b>Al</b> | <b>Mg</b> | <b>Ca</b> | <b>K</b> | <b>Na</b> | <b>Li</b> | <b>Mn</b> |
|-----------------------------------------------|-----------|-----------|-----------|-----------|-----------|-----------|----------|-----------|-----------|-----------|
| M <sup>x+</sup> cation radius (pm)            | 87        | 78        | 74        | 53.5      | 72        | 100       | 138      | 102       | 76        | 83        |
| Volumetric capacity (mAh cm <sup>-3</sup> )   | 7558      | 7558      | 5854      | 2980      | 3833      | 2077      | 592      | 1128      | 2061      | 7250      |
| Specific capacity (mAh g <sup>-1</sup> )      | 843       | 960       | 820       | 8035      | 2205      | 1340      | 687      | 1166      | 3860      | 976       |
| Price (\$ ton <sup>-1</sup> )                 | 9451      | 60        | 2944      | 2510      | 3000      | 1000      | 1470     | 8900      | 16500     | 2000      |
| M <sup>x+</sup> /M redox potential vs SHE (V) | +0.34     | -0.44     | -0.76     | -1.67     | -2.37     | -2.87     | -2.92    | -2.71     | -3.04     | -1.18     |

**Table S1.** Comparison of the properties of different metal electrodes.

| Solutions  | 1 mol L <sup>-1</sup> MnSO <sub>4</sub> | 1 mol L <sup>-1</sup> MnSO <sub>4</sub> + 1 mol L <sup>-1</sup> (NH <sub>4</sub> ) <sub>2</sub> SO <sub>4</sub> | 1 mol L <sup>-1</sup> MnSO <sub>4</sub> + 1 mol L <sup>-1</sup> (NH <sub>4</sub> ) <sub>2</sub> SO <sub>4</sub> +Se | 1 mol L <sup>-1</sup> MnCl <sub>2</sub> | 1 mol L <sup>-1</sup> MnCl <sub>2</sub> + 1 mol L <sup>-1</sup> NH <sub>4</sub> Cl | 1 mol L <sup>-1</sup> Mn(NO <sub>3</sub> ) <sub>2</sub> | 1 mol L <sup>-1</sup> Mn(NO <sub>3</sub> ) <sub>2</sub> + 1 mol L <sup>-1</sup> NH <sub>4</sub> Cl |
|------------|-----------------------------------------|-----------------------------------------------------------------------------------------------------------------|---------------------------------------------------------------------------------------------------------------------|-----------------------------------------|------------------------------------------------------------------------------------|---------------------------------------------------------|----------------------------------------------------------------------------------------------------|
| 1st        | 2.88                                    | 3.56                                                                                                            | 3.47                                                                                                                | 2.64                                    | 3.63                                                                               | 0.76                                                    | 1.53                                                                                               |
| 2nd        | 2.89                                    | 3.51                                                                                                            | 3.48                                                                                                                | 2.58                                    | 3.66                                                                               | 0.81                                                    | 1.55                                                                                               |
| 3rd        | 2.89                                    | 3.52                                                                                                            | 3.44                                                                                                                | 2.56                                    | 3.71                                                                               | 0.81                                                    | 1.49                                                                                               |
| Average pH | 2.887                                   | 3.53                                                                                                            | 3.463                                                                                                               | 2.593                                   | 3.667                                                                              | 0.793                                                   | 1.523                                                                                              |

**Table S2.** The list of pH values of different electrolytes in this work.

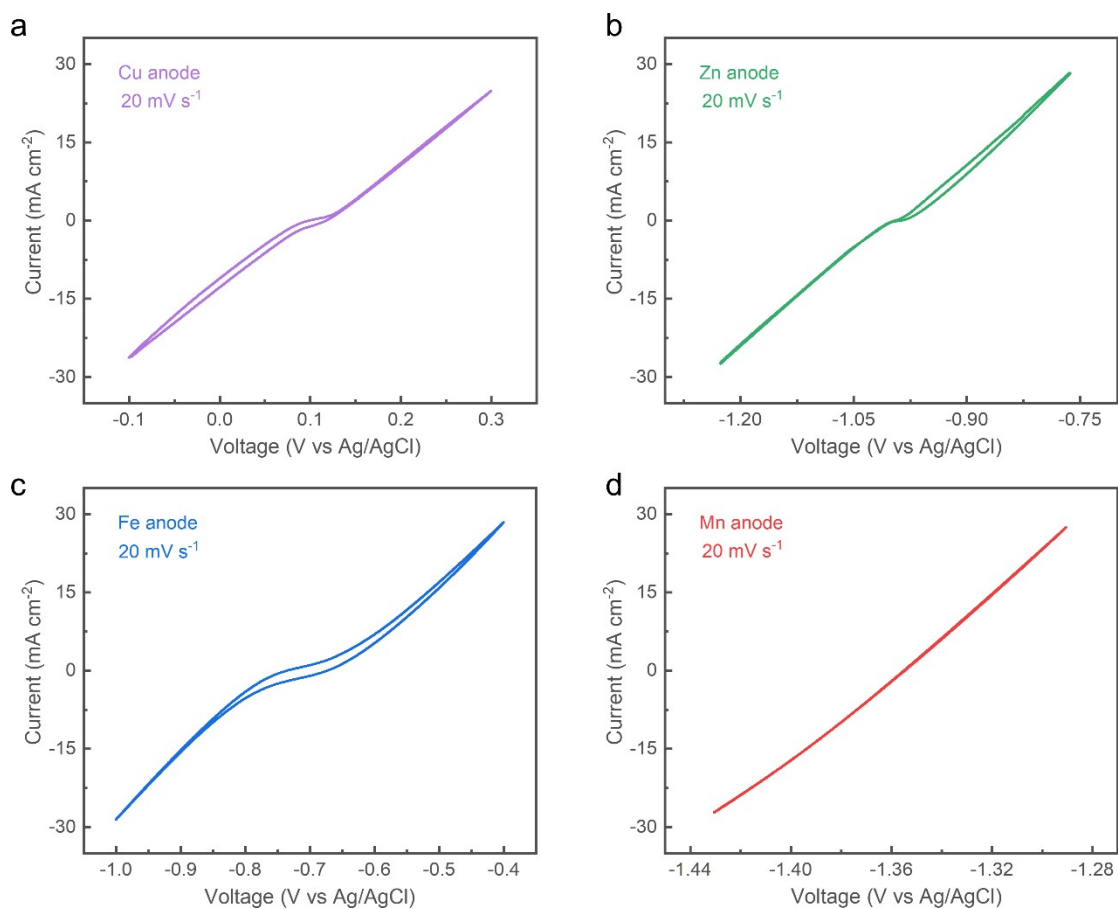

**Figure S1.** CV curves of Cu, Zn, Fe and Mn anodes in aqueous electrolytes at a scan rate of 20 mV s<sup>-1</sup>. The tests were performed in a three-electrode system using metal foil, graphite rod, and Ag/AgCl electrode as working electrode, counter electrode, and reference electrode, respectively. The corresponding electrolyte is 1 mol L<sup>-1</sup> metal sulfate in water.

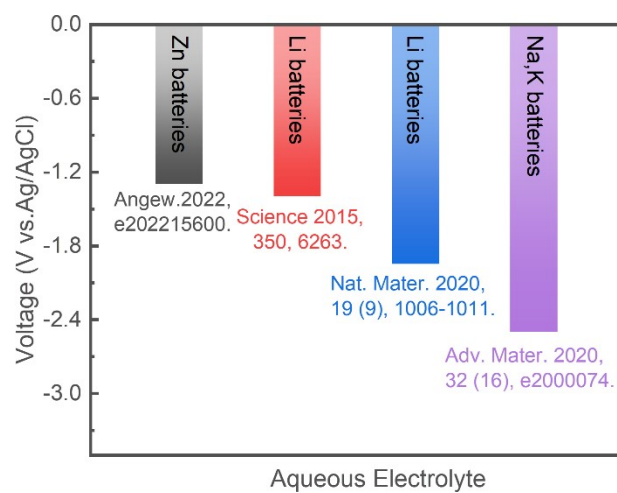

**Figure S2.** Summary of working potentials of aqueous batteries from some representative literature.

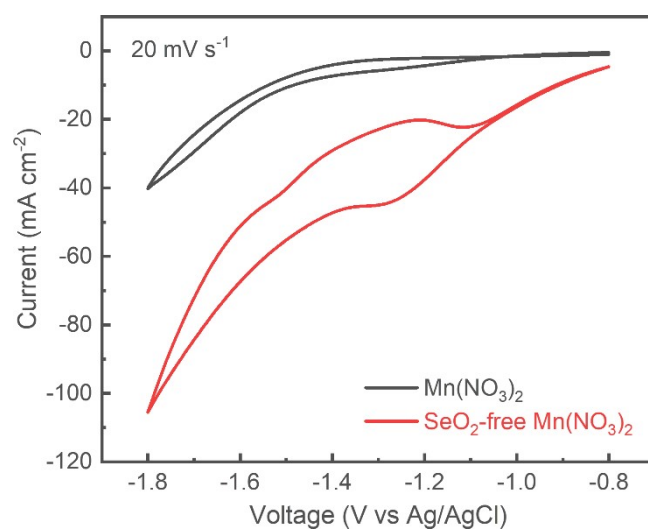

**Figure S3.** CV comparison in different Mn(NO<sub>3</sub>)<sub>2</sub> based aqueous electrolytes. The tests were conducted in a three-electrode system using Mn foil, graphite rod, and Ag/AgCl electrode as working electrode, counter electrode, and reference electrode, respectively, in Mn(NO<sub>3</sub>)<sub>2</sub> and SeO<sub>2</sub>-free Mn(NO<sub>3</sub>)<sub>2</sub> electrolytes.



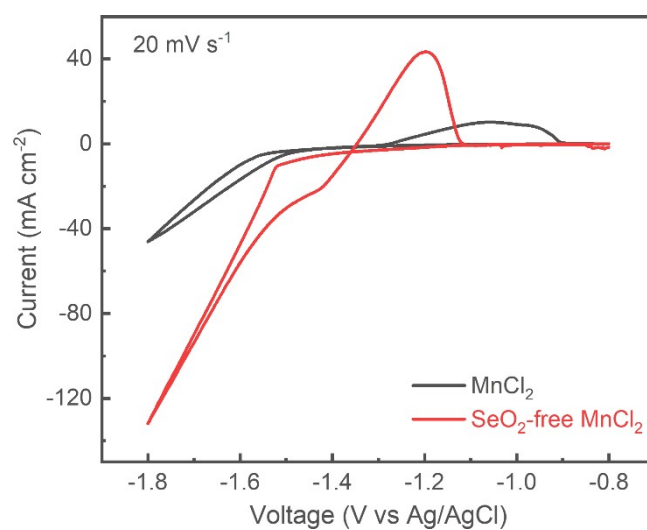

**Figure S4.** CV comparison in different MnCl<sub>2</sub> based aqueous electrolytes. The tests were conducted in a three-electrode system using Mn foil, graphite rod, and Ag/AgCl electrode as working electrode, counter electrode, and reference electrode, respectively, in MnCl<sub>2</sub> and SeO<sub>2</sub>-free MnCl electrolytes.

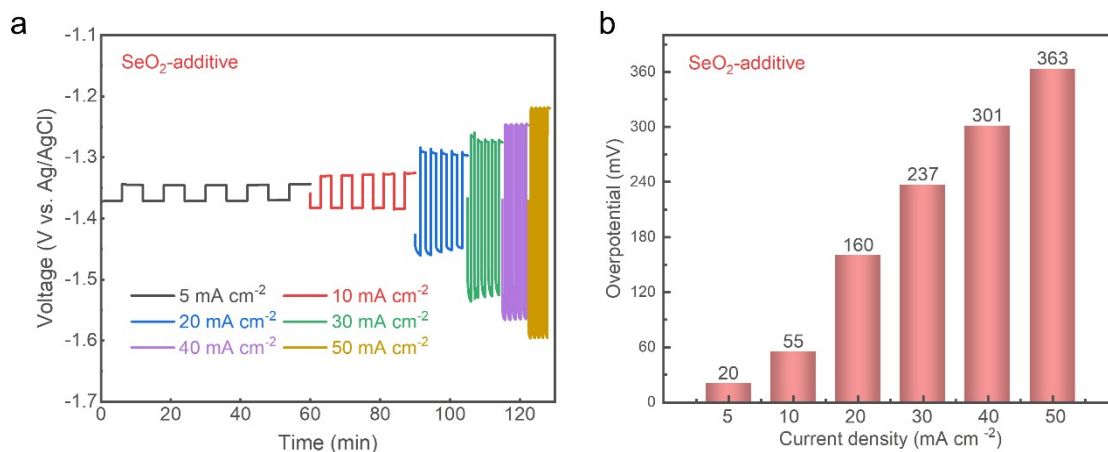

**Figure S5.** (a) Galvanostatic charge-discharge tests of a three-electrode cell for Mn anode in SeO<sub>2</sub>-additive MnSO<sub>4</sub> electrolyte, where the working, counter, and reference electrodes are Mn foil, graphite rod and Ag/AgCl, respectively. (b) Summary of the Mn anode overpotentials under different current densities.

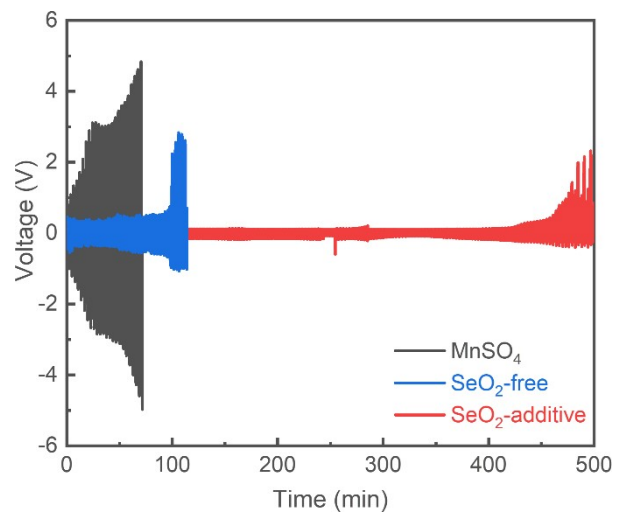

**Figure S6.** Cycling curves of Mn-Mn symmetric batteries in different electrolytes.

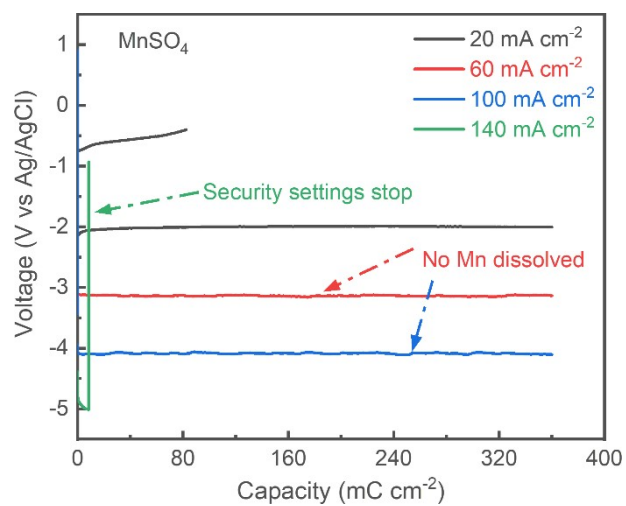

**Figure S7.** Galvanostatic charge-discharge tests of Cu|Mn asymmetric half-cell in MnSO<sub>4</sub> electrolyte.

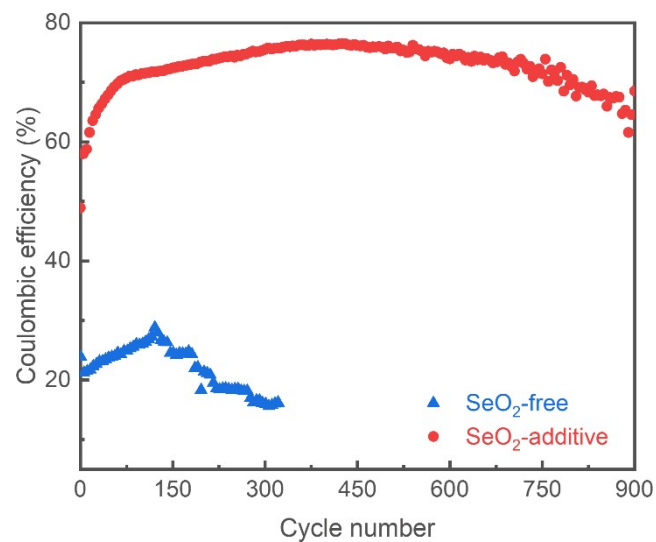

**Figure S8.** The CE of Mn deposition and dissolution cycles in different electrolytes.

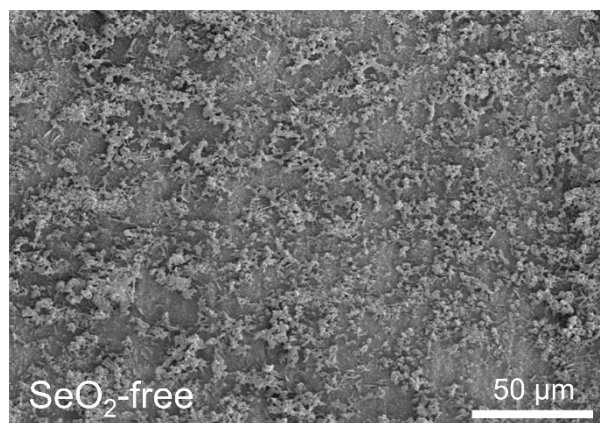

**Figure S9.** SEM image of deposited Mn in SeO<sub>2</sub>-free MnSO<sub>4</sub> electrolyte.

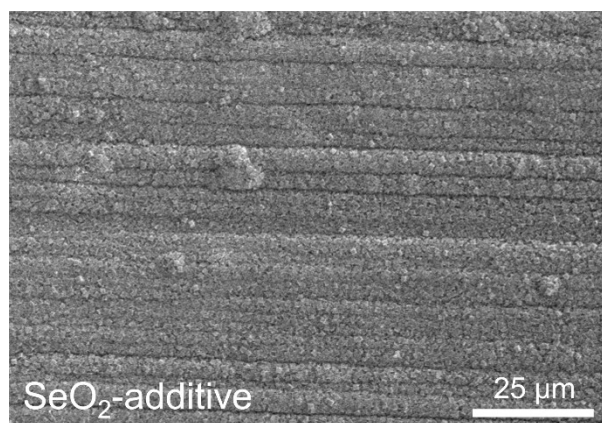

**Figure S10.** SEM image of deposited Mn in SeO<sub>2</sub>-additive MnSO<sub>4</sub> electrolyte.

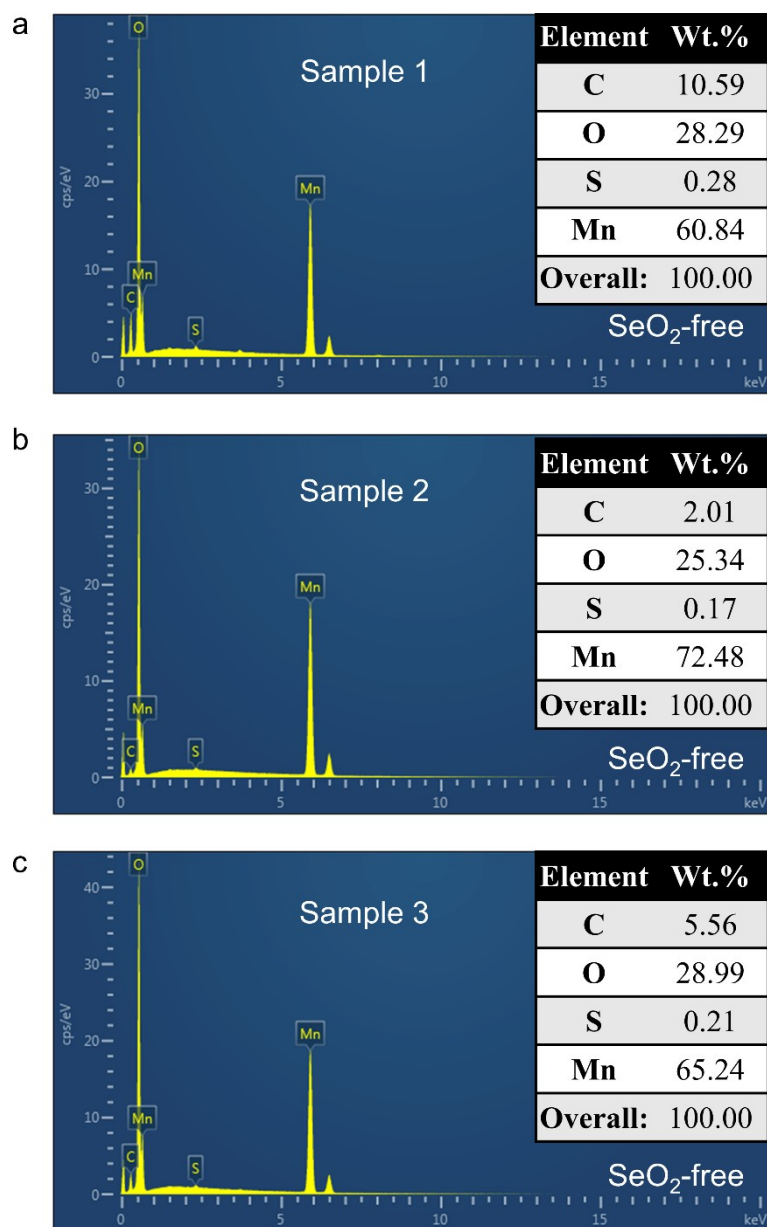

**Figure S11.** EDS spectra of deposited Mn on Cu foil in SeO<sub>2</sub>-free MnSO<sub>4</sub> electrolyte. The table in the figure shows the content of different elements.



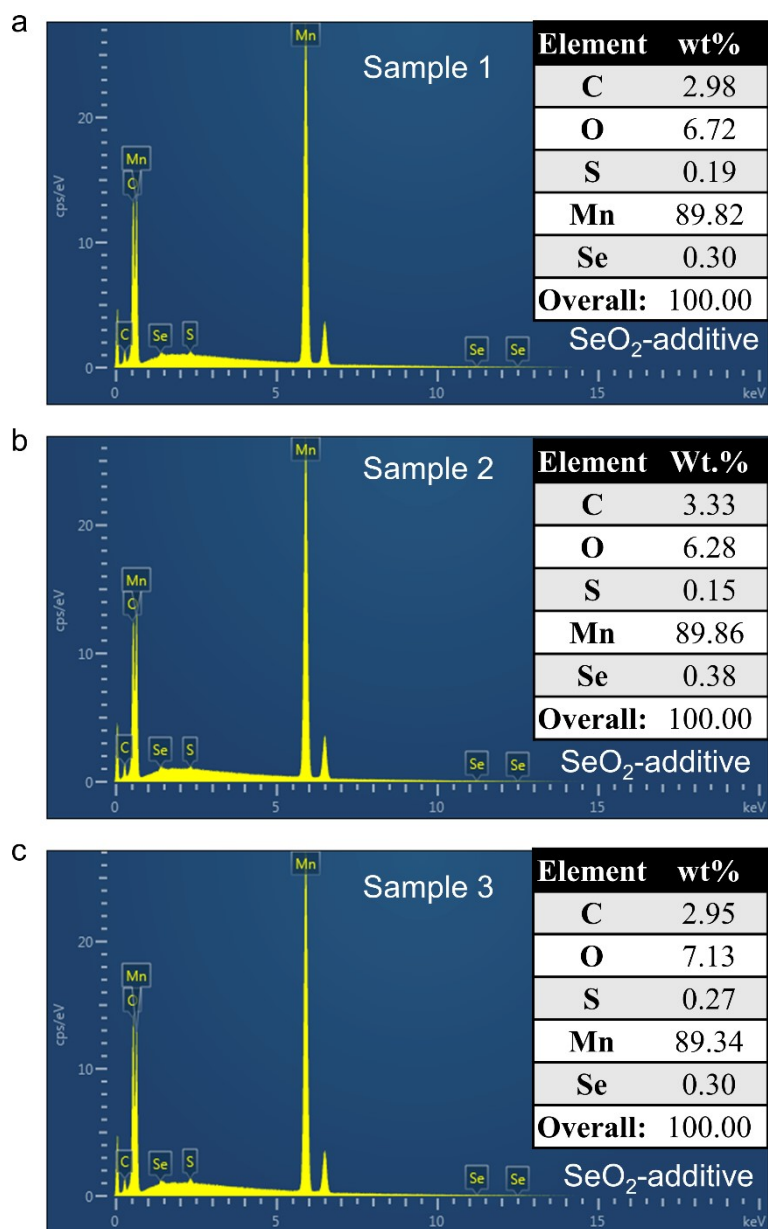

**Figure S12.** EDS spectra of deposited Mn on Cu foil in SeO<sub>2</sub>-additive MnSO<sub>4</sub> electrolyte. The table in the figure shows the contents of different elements.

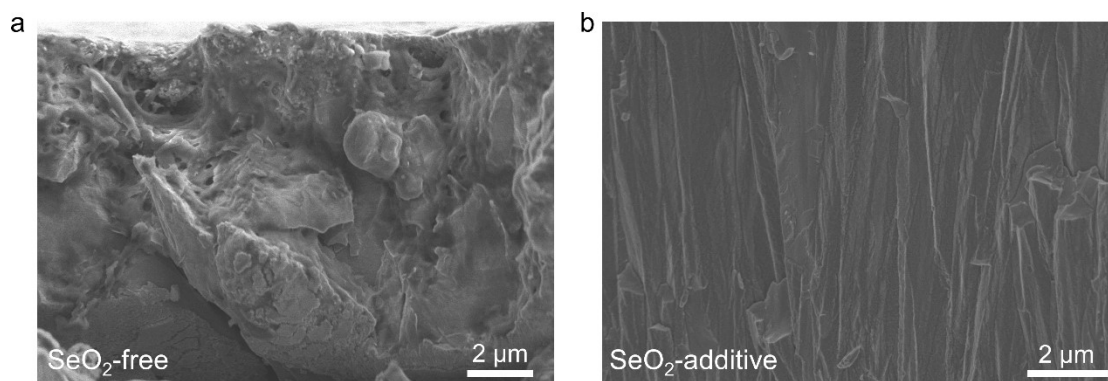

**Figure S13.** Cross-sectional SEM images of deposited Mn in SeO<sub>2</sub>-free MnSO<sub>4</sub> electrolyte (a) and SeO<sub>2</sub>-additive MnSO<sub>4</sub> electrolyte (b).

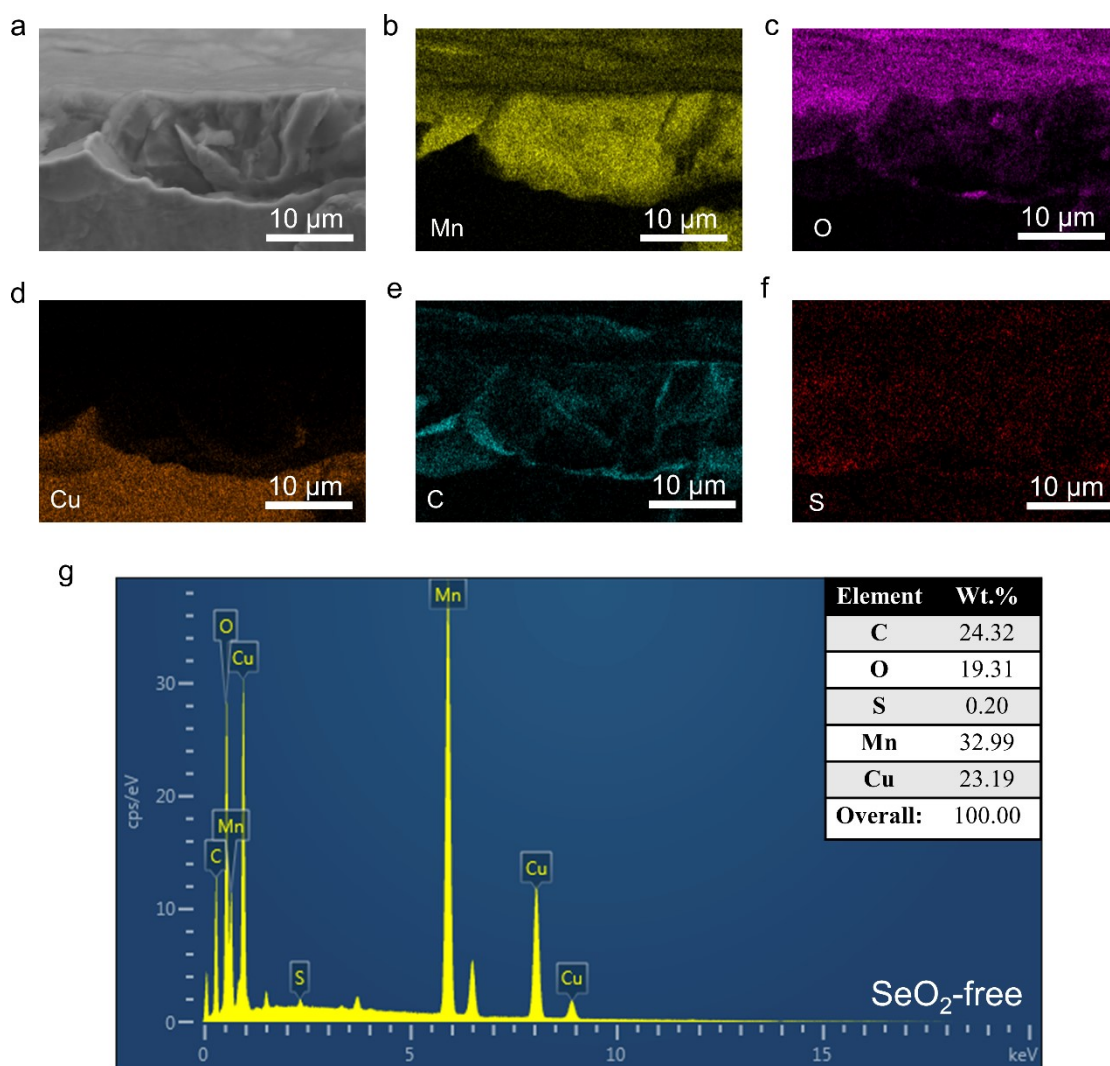

**Figure S14.** EDS mapping of cross-section of deposited Mn on Cu foil in SeO<sub>2</sub>-free MnSO<sub>4</sub> electrolyte. The table in the figure shows the contents of different elements.

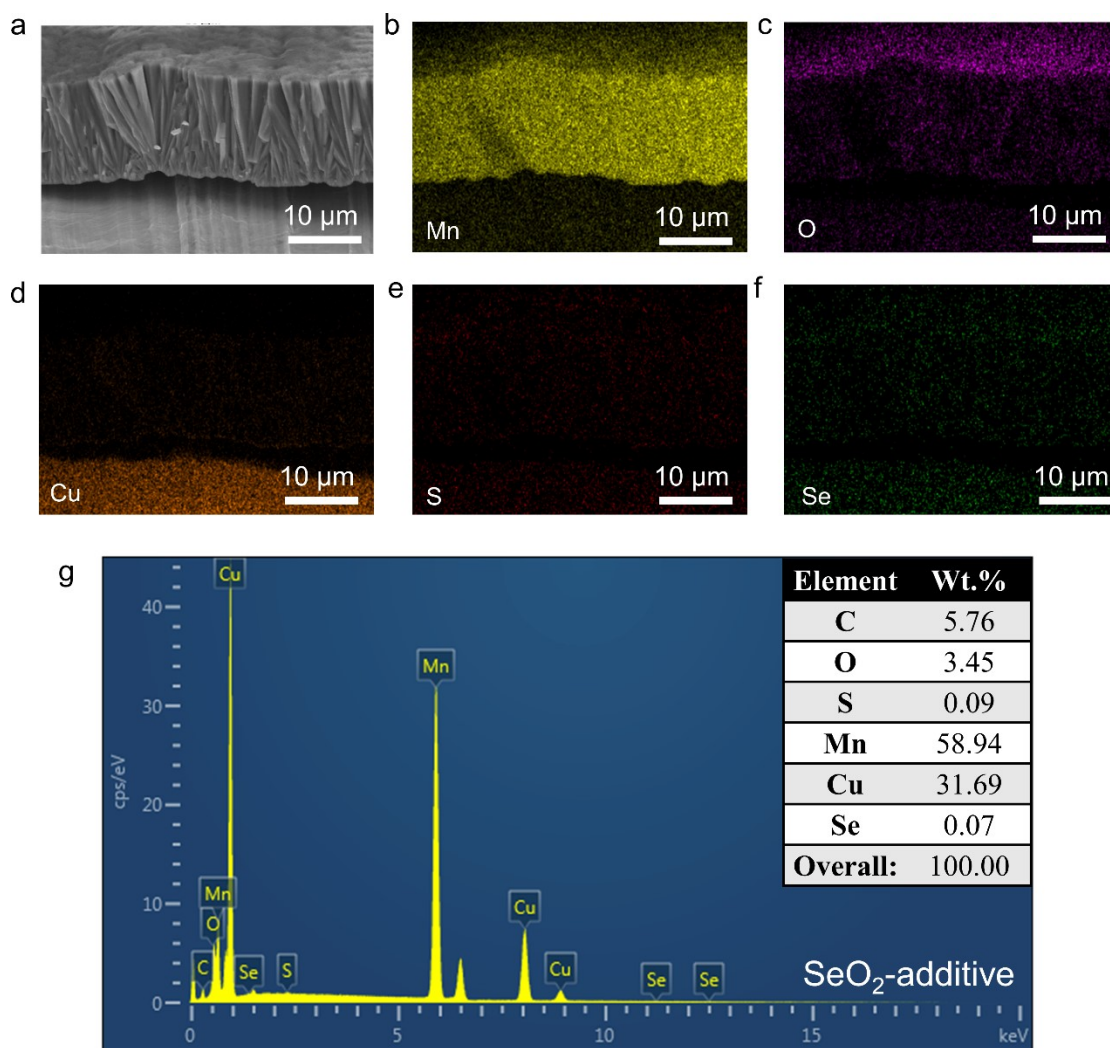

**Figure S15.** EDS mapping of cross-section of deposited Mn on Cu foil in SeO<sub>2</sub>-additive MnSO<sub>4</sub> electrolyte. The table in the figure shows the contents of different elements.

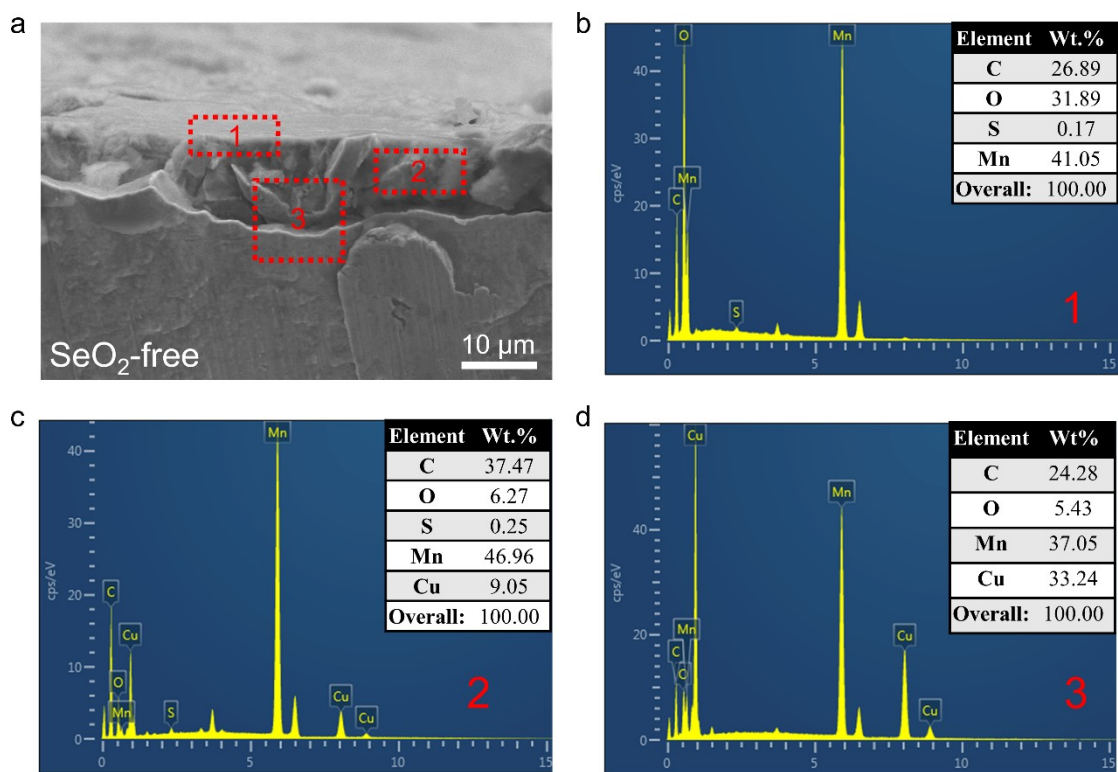

**Figure S16.** Point scan EDS mapping of different areas of deposited Mn on Cu foil in SeO<sub>2</sub>-free MnSO<sub>4</sub> electrolyte. The table in the figure shows the contents of different elements.

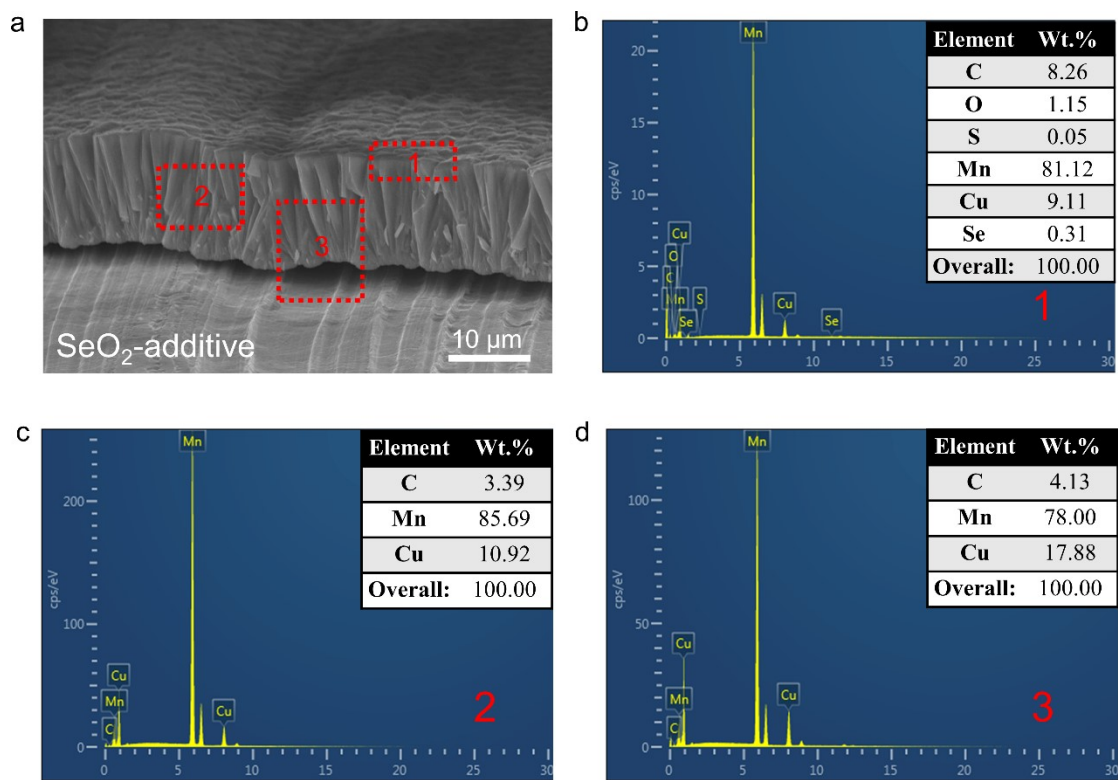

**Figure S17.** Point scan EDS mapping of different areas of deposited Mn on Cu foil in SeO<sub>2</sub>-additive MnSO<sub>4</sub> electrolyte. The table in the figure shows the contents of different elements.

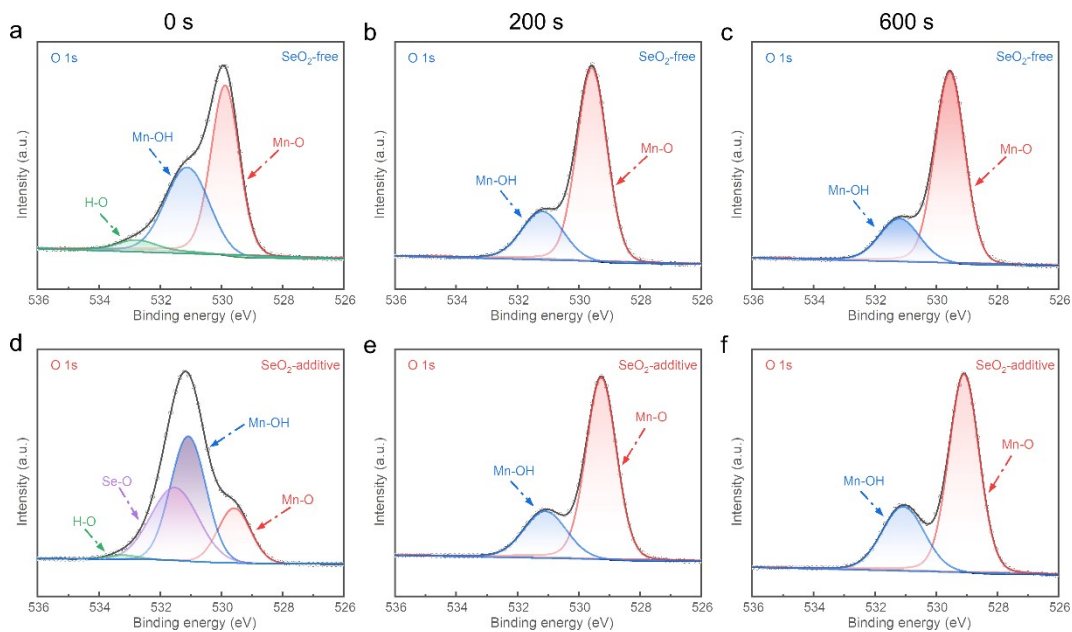

**Figure S18.** XPS of O 1s of deposited Mn on Cu foil in SeO<sub>2</sub>-free MnSO<sub>4</sub> electrolyte (a-c) and SeO<sub>2</sub>-additive MnSO<sub>4</sub> electrolyte (d-e) after Ar<sup>+</sup> sputtering for different durations: (a, d) 0 s, (b, e) 200 s, (c, f) 600 s.

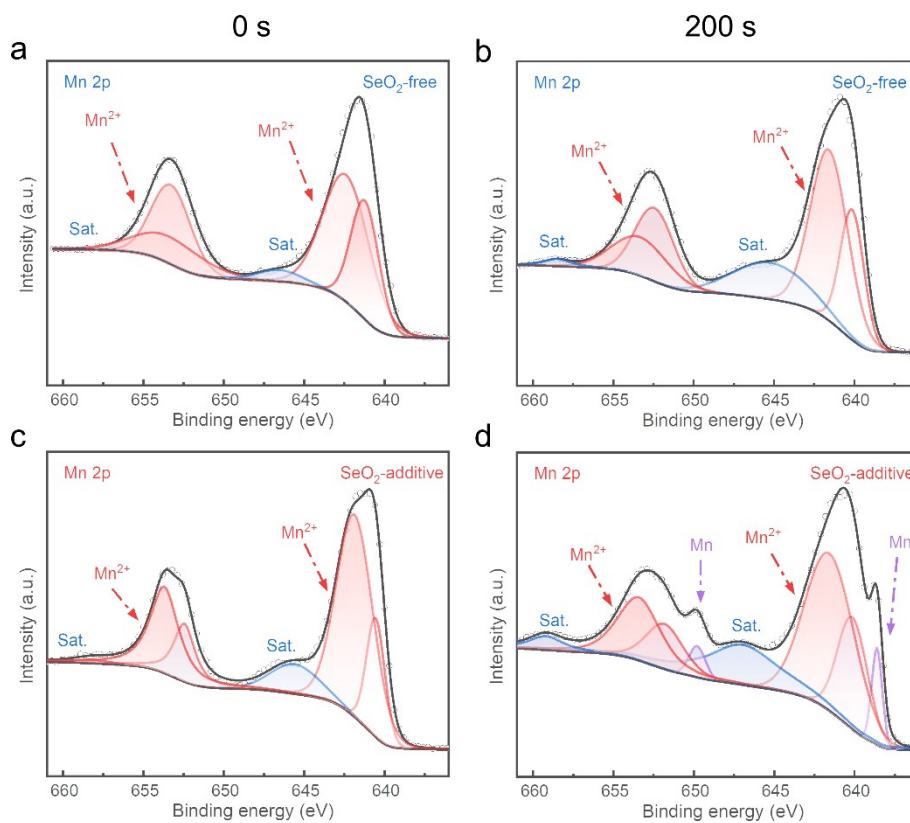

**Figure S19.** XPS of Mn 2p of deposited Mn on Cu foil in SeO<sub>2</sub>-free MnSO<sub>4</sub> electrolyte (a-b) and SeO<sub>2</sub>-additive MnSO<sub>4</sub> electrolyte (c-d) after Ar<sup>+</sup> sputtering for different durations: (a, c) 0 s, (b, d) 200 s.



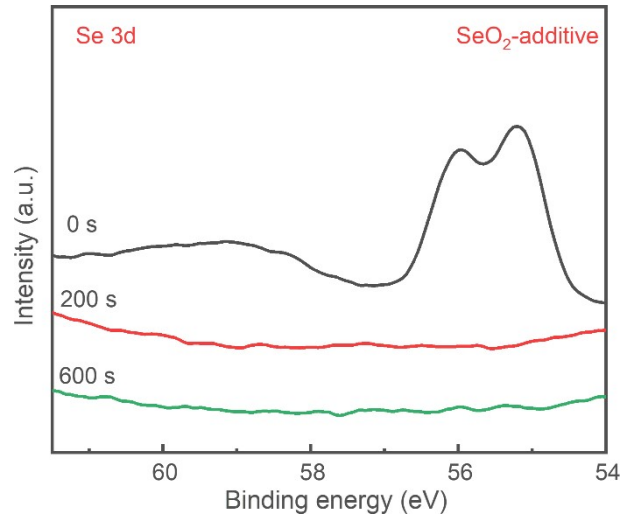

**Figure S20.** XPS of Se 3d of deposited Mn on Cu foil in SeO<sub>2</sub>-additive MnSO<sub>4</sub> electrolyte after Ar<sup>+</sup> sputtering for different durations.

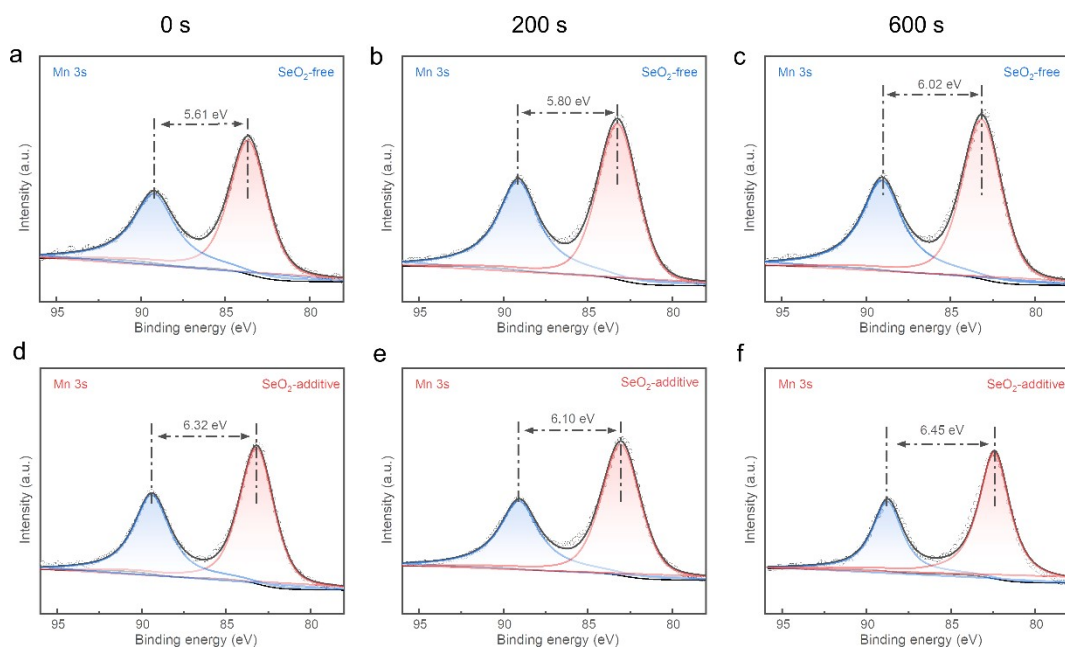

**Figure S21.** XPS of Mn 3s of deposited Mn on Cu foil in SeO<sub>2</sub>-free MnSO<sub>4</sub> electrolyte (a-c) and SeO<sub>2</sub>-additive MnSO<sub>4</sub> electrolyte (d-e) after Ar<sup>+</sup> sputtering for different durations: (a, d) 0 s, (b, e) 200 s, (c, f) 600 s.

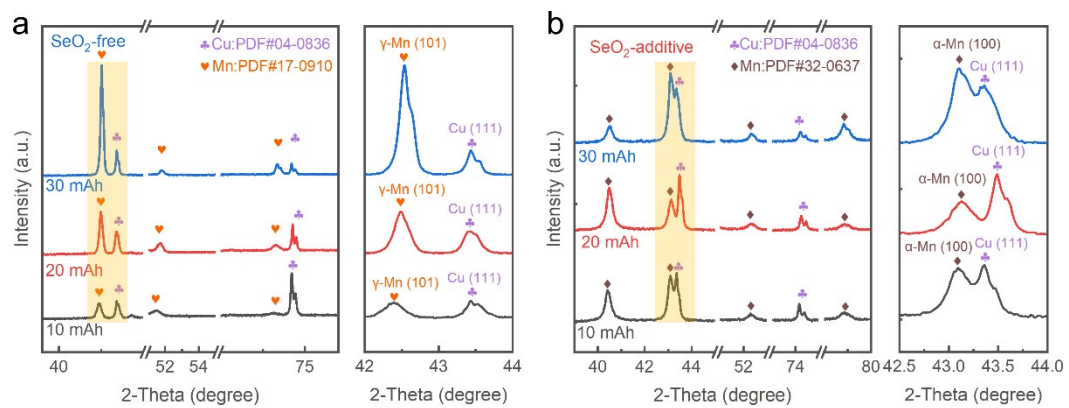

**Figure S22.** XRD of deposited Mn on Cu foil with different capacities in different electrolytes.

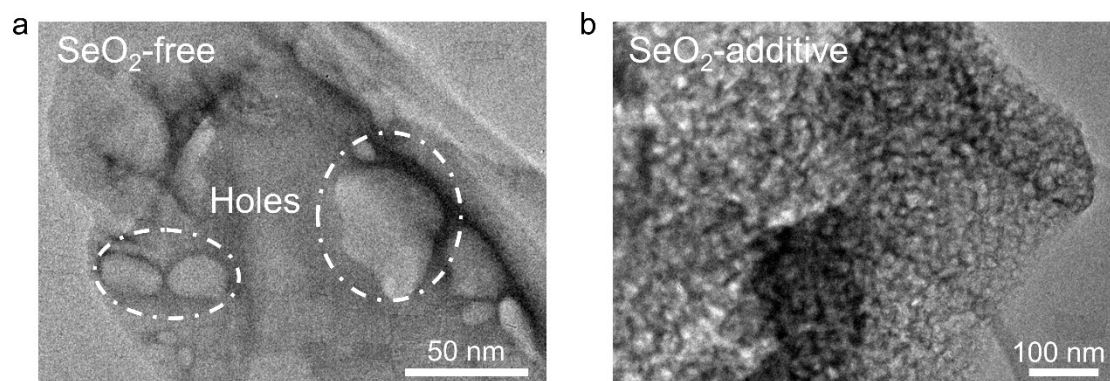

**Figure S23.** TEM images of deposited Mn in SeO<sub>2</sub>-free (a) and SeO<sub>2</sub>-additive MnSO<sub>4</sub> electrolytes (b).

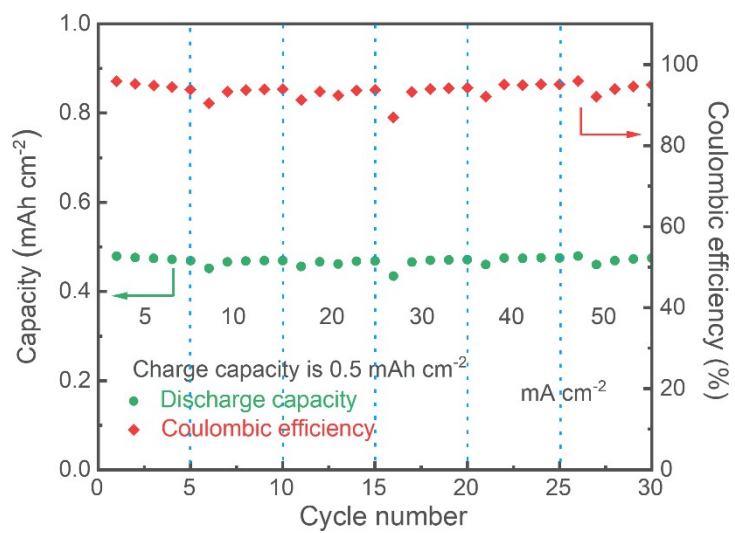

**Figure S24.** Rate performance of AAMB with different current densities from 5 to 50 mA cm<sup>-2</sup>.

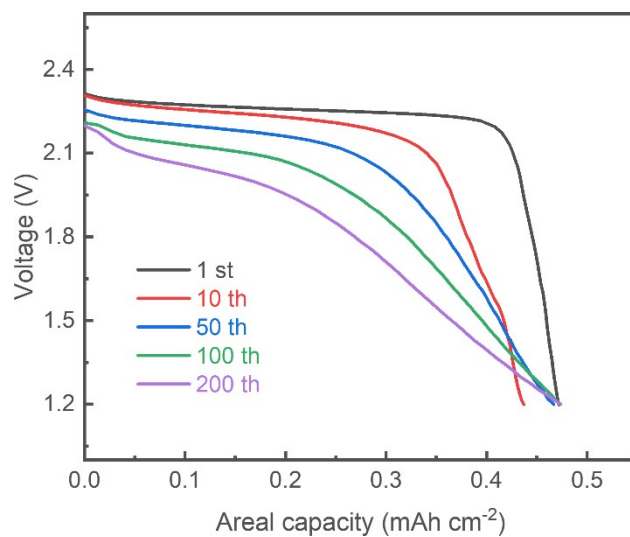

**Figure S25.** Discharge curves of aqueous all-Mn batteries in different cycles.

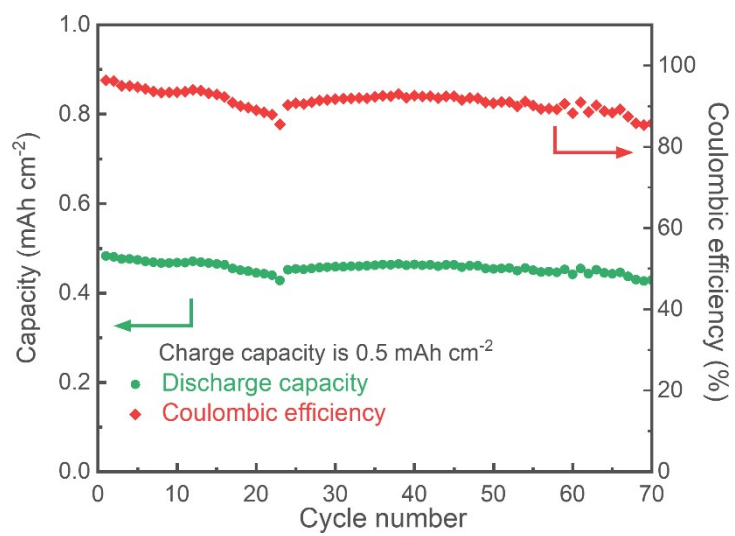

**Figure S26.** Cycling test of AAMB at 2 mA cm<sup>-2</sup>.

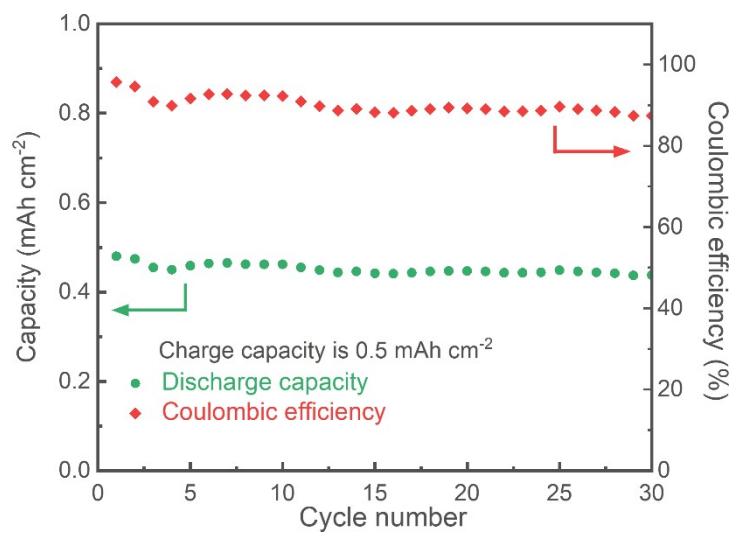

**Figure S27.** Cycling test of AAMB at 1 mA cm<sup>-2</sup>.



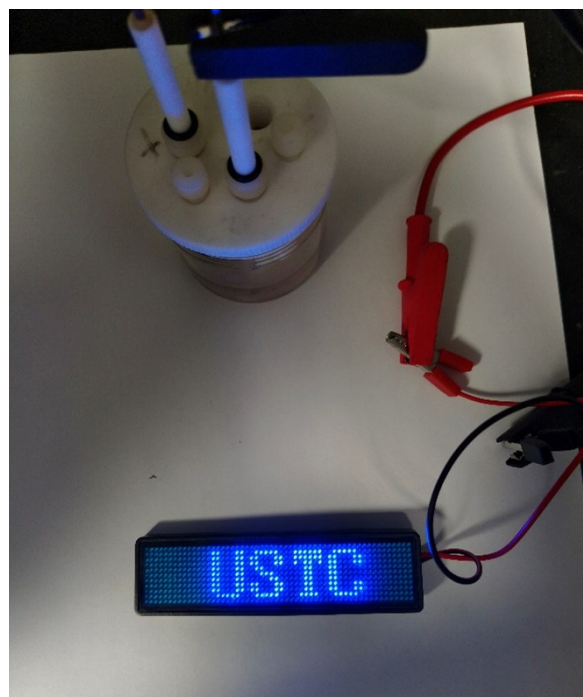

**Figure S28.** A digital photograph of an LED screen with the logo of “USTC” lighting by the AAMB.

| Battery type                          | Electrochemical reaction mechanism                                          | Work Voltage (V) | Theoretical energy density (Wh kg <sup>-1</sup> ) | Practical energy density (Wh kg <sup>-1</sup> ) | Status                   |
|---------------------------------------|-----------------------------------------------------------------------------|------------------|---------------------------------------------------|-------------------------------------------------|--------------------------|
| <b>Aqueous all-Mn battery</b>         | $Mn + MnO_2 + 2H_2SO_4 \leftrightarrow 2MnSO_4 + 2H_2O$                     | 2.42             | 913                                               | -                                               | Proof-of-concept         |
| <b>Organic Li-ion battery</b>         | $LiC_6 + FePO_4 \leftrightarrow LiFePO_4 + 6C$                              | 3.3              | 385                                               | 150                                             | Mature commercialization |
| <b>Aqueous Lead-acid battery</b>      | $Pb + PbO_2 + 2H_2SO_4 \leftrightarrow 2PbSO_4 + 2H_2O$                     | 2.0              | 167                                               | 35                                              | Mature commercialization |
| <b>Aqueous Ni-Fe battery</b>          | $Fe + 2NiOOH + 2H_2O \leftrightarrow Fe(OH)_2 + 2Ni(OH)_2$                  | 1.2              | 234                                               | 40                                              | Mature commercialization |
| <b>Aqueous Ni-MH battery</b>          | $MH + NiOOH \leftrightarrow M + Ni(OH)_2$                                   | 1.35             | 340                                               | 100                                             | Mature commercialization |
| <b>Aqueous Alkaline-Ni-Zn battery</b> | $Zn + 2NiOOH + 2H_2O \leftrightarrow Zn(OH)_2 + 2Ni(OH)_2$                  | 1.7              | 372                                               | 90                                              | Mature commercialization |
| <b>Aqueous All-V flow battery</b>     | $VO_2^+ + V^{2+} + 2H^+ \leftrightarrow VO^{2+} + H_2O$                     | 1.26             | 250                                               | <50                                             | Mature commercialization |
| <b>HT Na-S battery</b>                | $2Na + xS \leftrightarrow Na_2S_x$                                          | ~2               | 760                                               | -                                               | Mature commercialization |
| <b>Organic Na-ion battery</b>         | $Na_xC_6 + Na_{1-x}MO_2 \leftrightarrow NaMnO_2 + C$                        | 2~4              | 300~400                                           | 100                                             | Under development        |
| <b>Aqueous Na-ion battery</b>         | $2Na_3MnTi(PO_4)_3 \leftrightarrow Na_4MnTi_2(PO_4)_6$                      | 1.4              | 41                                                | -                                               | Under development        |
| <b>Aqueous K-ion battery</b>          | $KFeMnHCF + PCTDI \leftrightarrow K_xP'$                                    | 1.2              | -                                                 | -                                               | Under development        |
| <b>Aqueous Al-ion battery</b>         | $Al_xMnO_2 \cdot nH_2O + (y-x)Al(OH)_3 \leftrightarrow Al(OH)_3 + Mn(OH)_2$ | 1.1              | 561                                               | -                                               | Under development        |
| <b>Aqueous Zn-ion battery</b>         | $Zn + 2MnO_2 \leftrightarrow ZnMn_2O_4; Zn$                                 | 1.35             | 302                                               | -                                               | Under development        |

|                |                                                                  |     |     |   |                   |
|----------------|------------------------------------------------------------------|-----|-----|---|-------------------|
| <b>battery</b> | $1.1Zn + Zn_{0.25}V_2O_6 \leftrightarrow Zn_{1.35}^{\downarrow}$ | 0.8 | 175 | - | Under development |
|----------------|------------------------------------------------------------------|-----|-----|---|-------------------|

**Table S3.** Comparison of different commercialized electrochemical energy storage technologies and other aqueous batteries.

**Movie S1.** Mn plating and stripping in SeO<sub>2</sub>-additive MnSO<sub>4</sub> electrolyte.
